# Supplementary material for: Prevalence of infant bronchiolitis‐coded healthcare encounters attributable to RSV
Source: PubMed Central journal article supplement (PMC6295609; doi:10.1002/hsr2.91), 2018-10-12

Figure S1A: Total ICD-9 coded bronchiolitis and RSV positive episodes by month

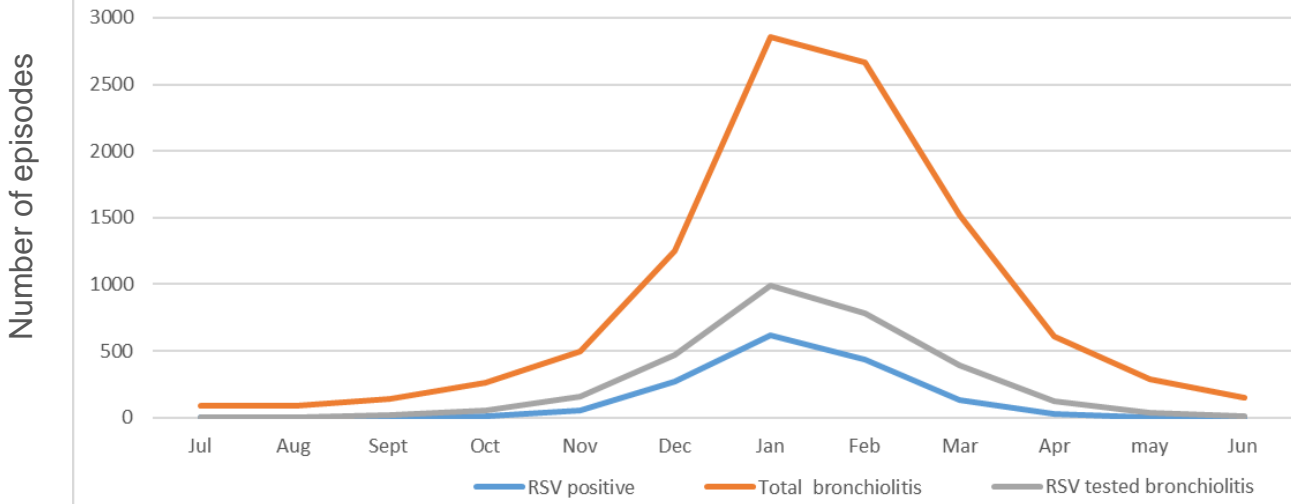

Figure S1B: ICD-9 Coded (466.11) acute RSV bronchiolitis and RSV positive episodes by month

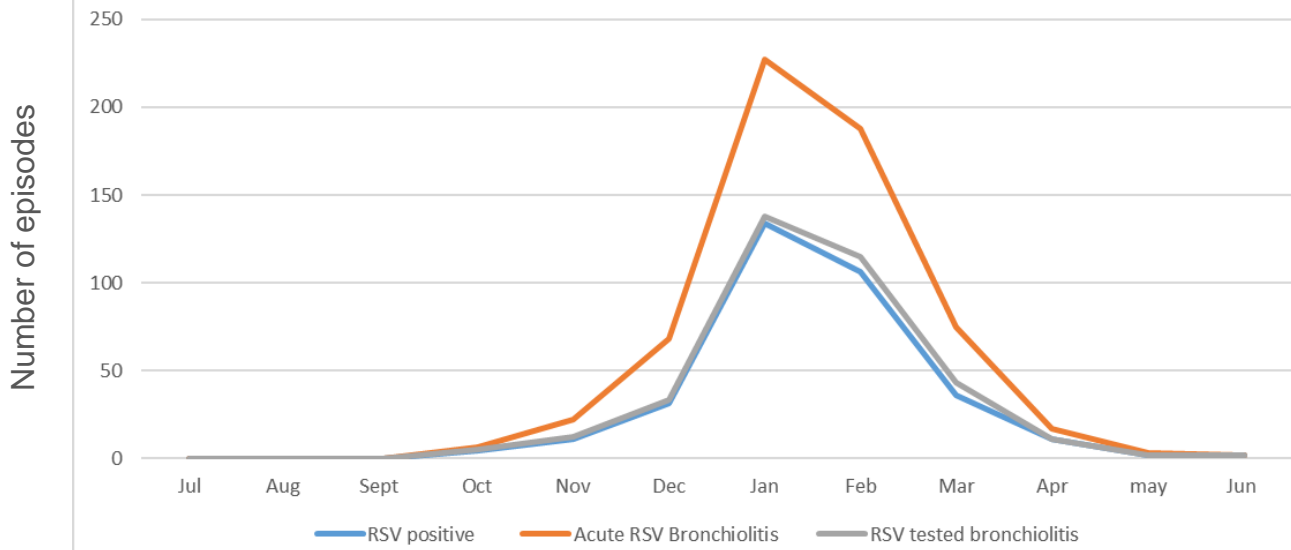

Figure S1C: ICD-9 Coded (480.1) viral pneumonia and RSV positive episodes by month

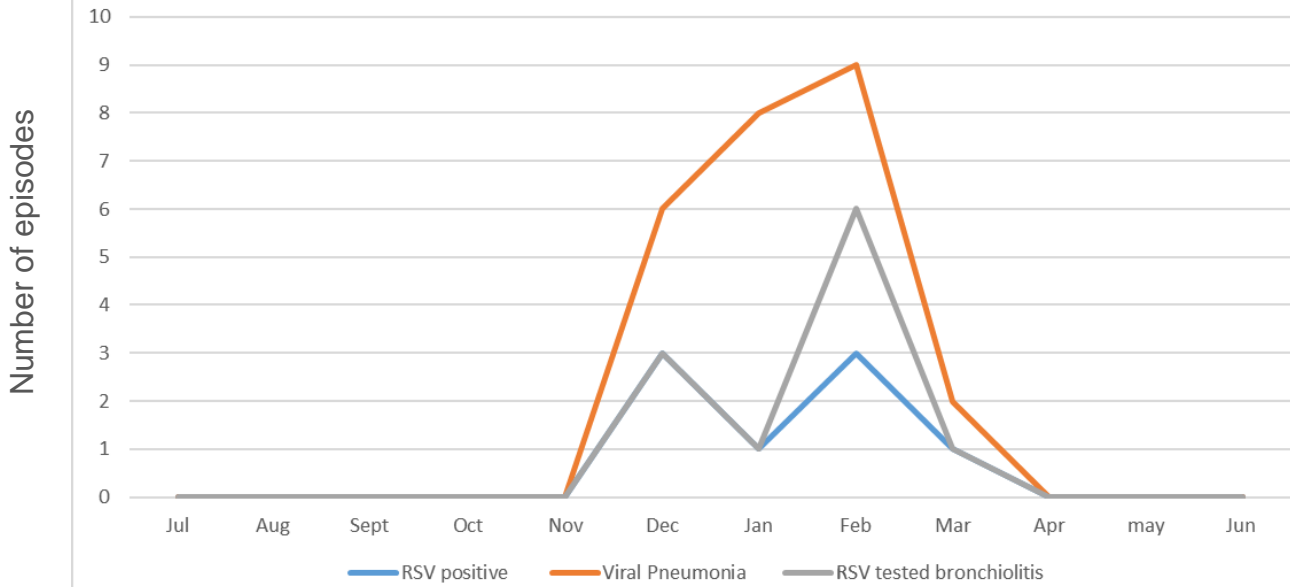

Figure S1D: ICD-9 Coded (466.19) acute bronchiolitis due to other infectious organisms and RSV positive episodes by month

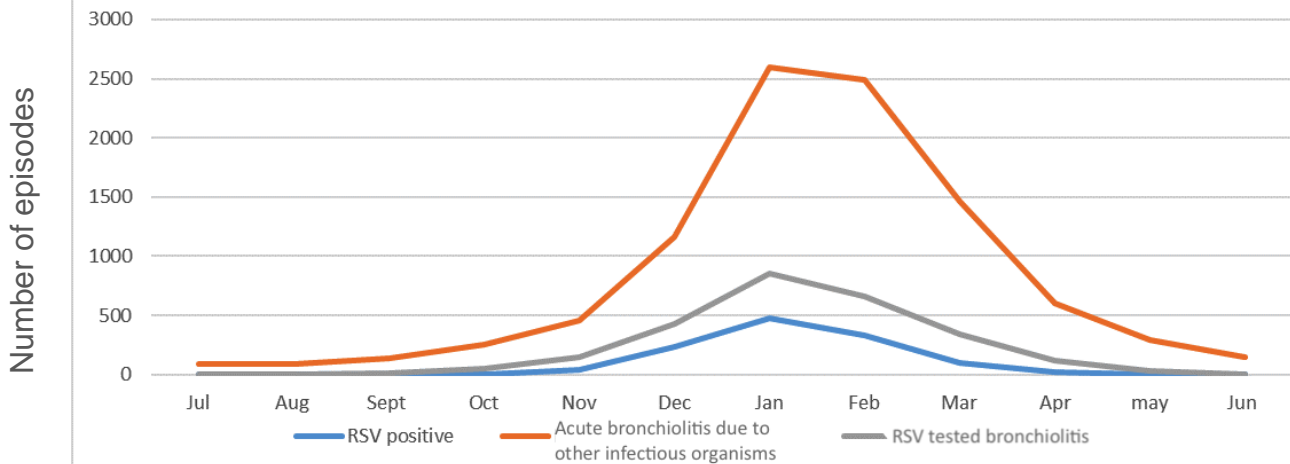

Supplement: HSR2-1-e91-s001.pdf [file HSR2-1-e91-s001.pdf]
